# Supplementary material for: Editing an α-globin enhancer in primary human hematopoietic stem cells as a treatment for β-thalassemia
Source: PubMed Central journal article supplement (PMC5583283; doi:10.1038/s41467-017-00479-7), 2017-09-04
Supplement: 41467_2017_479_MOESM1_ESM.pdf [file 41467_2017_479_MOESM1_ESM.pdf]

File name: Supplementary Information

Description: Supplementary figures and supplementary tables.

File name: Peer review file

Description:

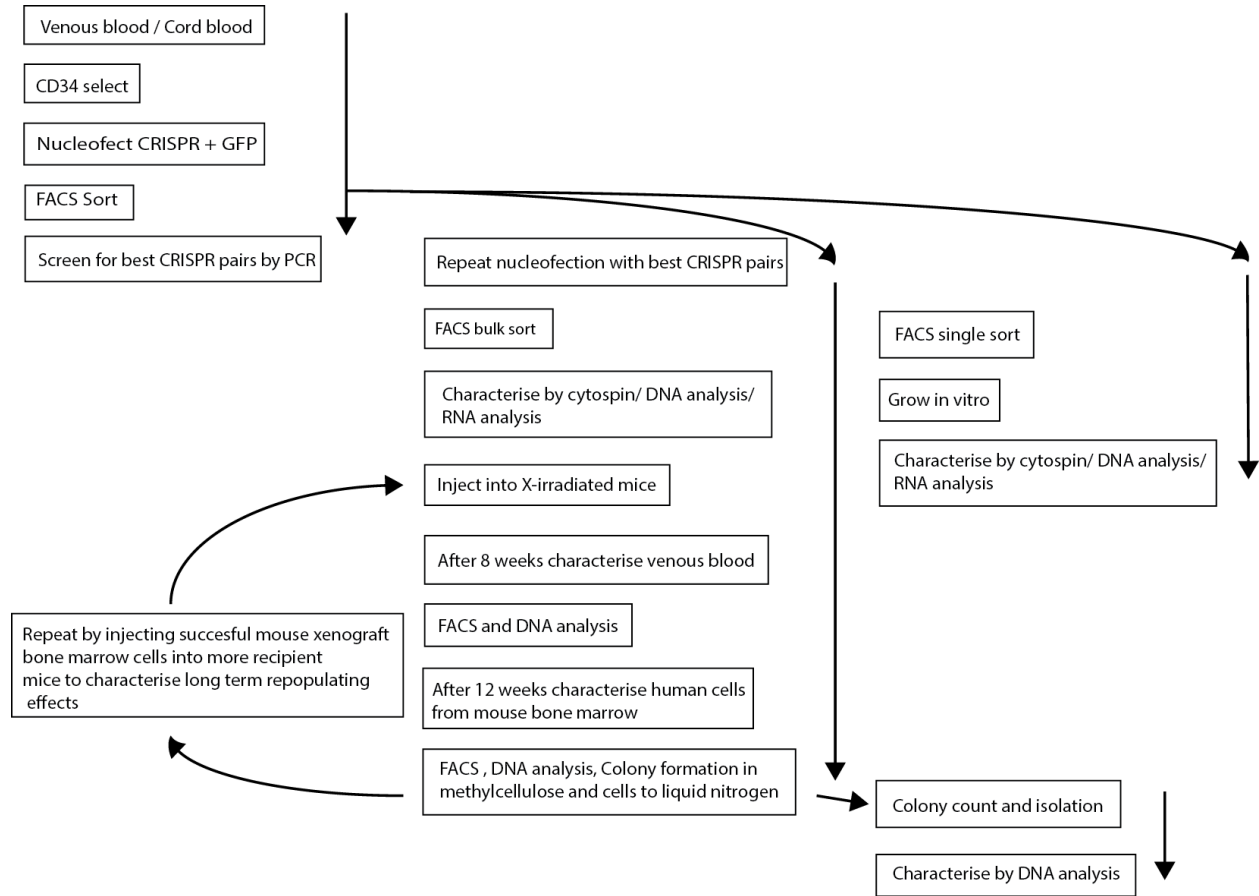

**Supplementary figure 1 – Flow diagram summarizing the overall experimental strategy**

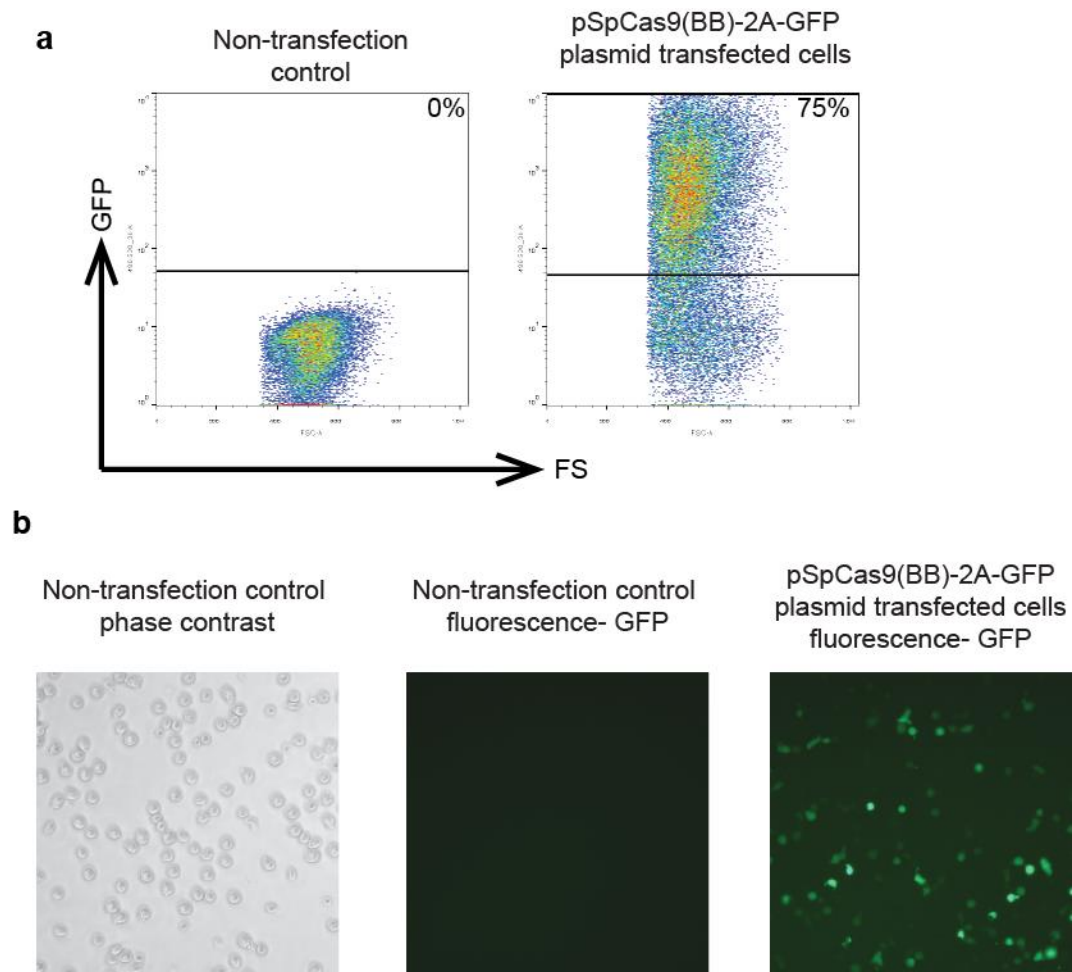

**Supplementary figure 2 - Efficiency of the transfection of primary CD34+ HSPCs.** (a) Flow cytometry plots of non-transfection control and CRISPR plasmid transfected cells demonstrating GFP expression. (b) Fluorescent microscopy image of non-transfection control and CRISPR plasmid transfected cells showing green fluorescence in transfected cells. Exposure times of fluorescence images of control and plasmid transfected cells were constant.

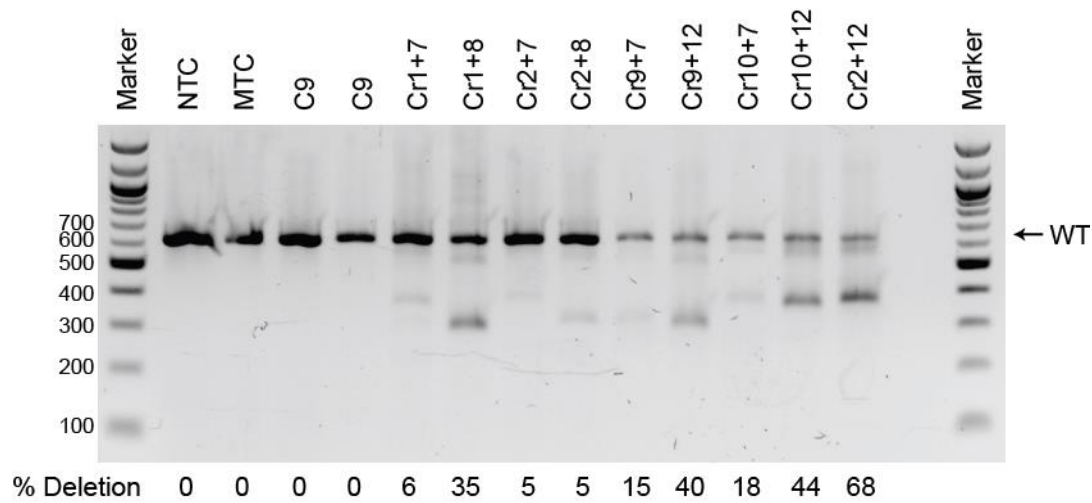

**Supplementary figure 3 - Gel electrophoresis image of CD34+ HSPCs transfected with different CRISPR/Cas9 plasmid pairs analyzed by PCR.** Wild type (WT) amplicon is 613 bp and depending on the sgRNA target site, deletions produced amplicons with lengths between 302 – 390 bp. Percentages of mutated alleles determined by band intensity is shown below each lane. Abbreviations: NTC, non-transfection control; MTC, mock transfection control; C9, Cas9-only control.

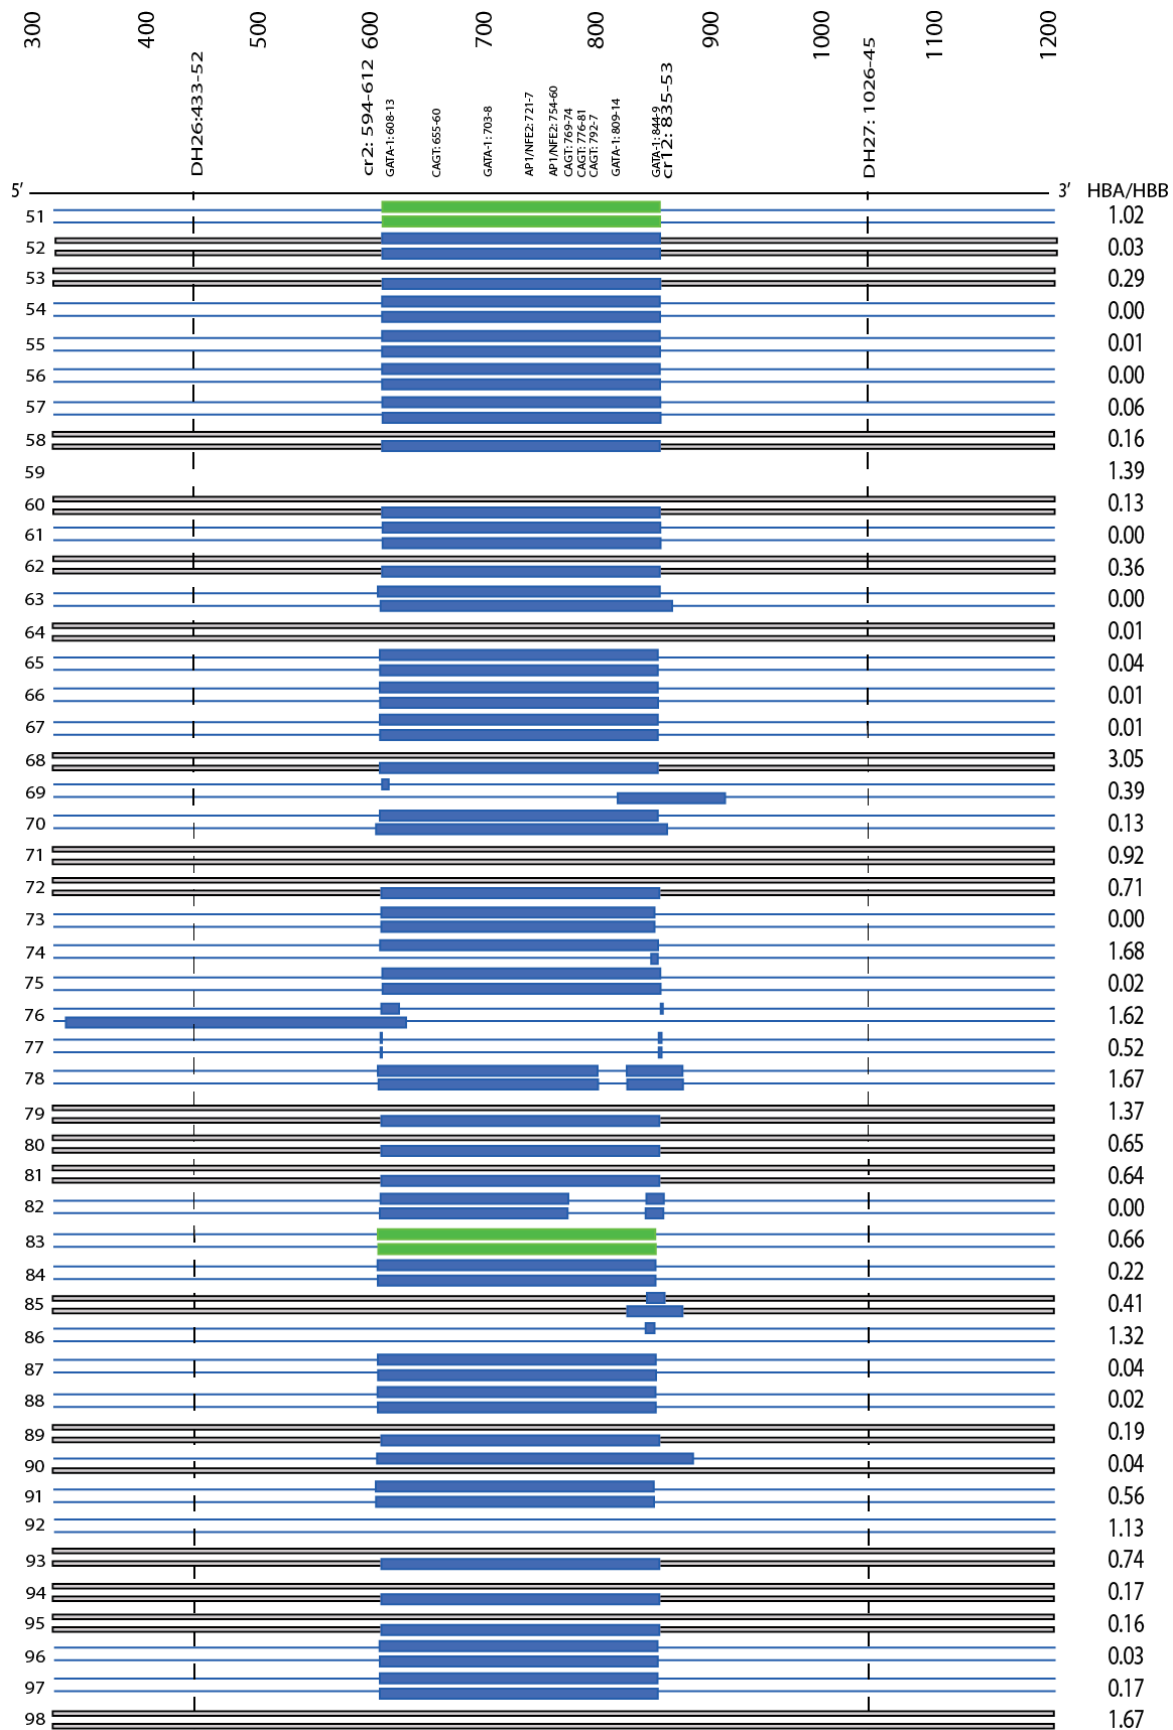

**Supplementary figure 4 – Genotype analysis by sequencing of individual single cell clones edited using CRISPR pair Cr2+Cr12 (Clone 51-98).** Two blue lines represent each allele and different mutations are represented as follows: blue bars – deletions, green bars – inversions. Single base pair variations that were observed around sgRNA binding sites are not shown. The grey bars extending across represent sequence data which are not available either because not attempted (non-deleted clones by PCR were not sequenced) or unreadable. Vertical dashed lines show the sites of forward (DH26) and reverse (DH27) primers used for PCR amplification shown in figure 3a. Expected break points of CRISPR 2 (Cr2) and CRISPR 12 (Cr12) as well as the important transcription factor binding motifs of the MCS-R2 enhancer are annotated at the top of the diagram. The  $\alpha/\beta$ -globin mRNA ratios (HBA/HBB) of individual clones are presented next to the genotype diagram. The co-ordinates from this contig are from Hum Mar 2006 (NCBI36/hg18) Assembly where 1 on this contig is equivalent to chr16: 102901. Deletions that extended beyond the oligonucleotides DH26 and/or DH27 were analysed with oligos further out.

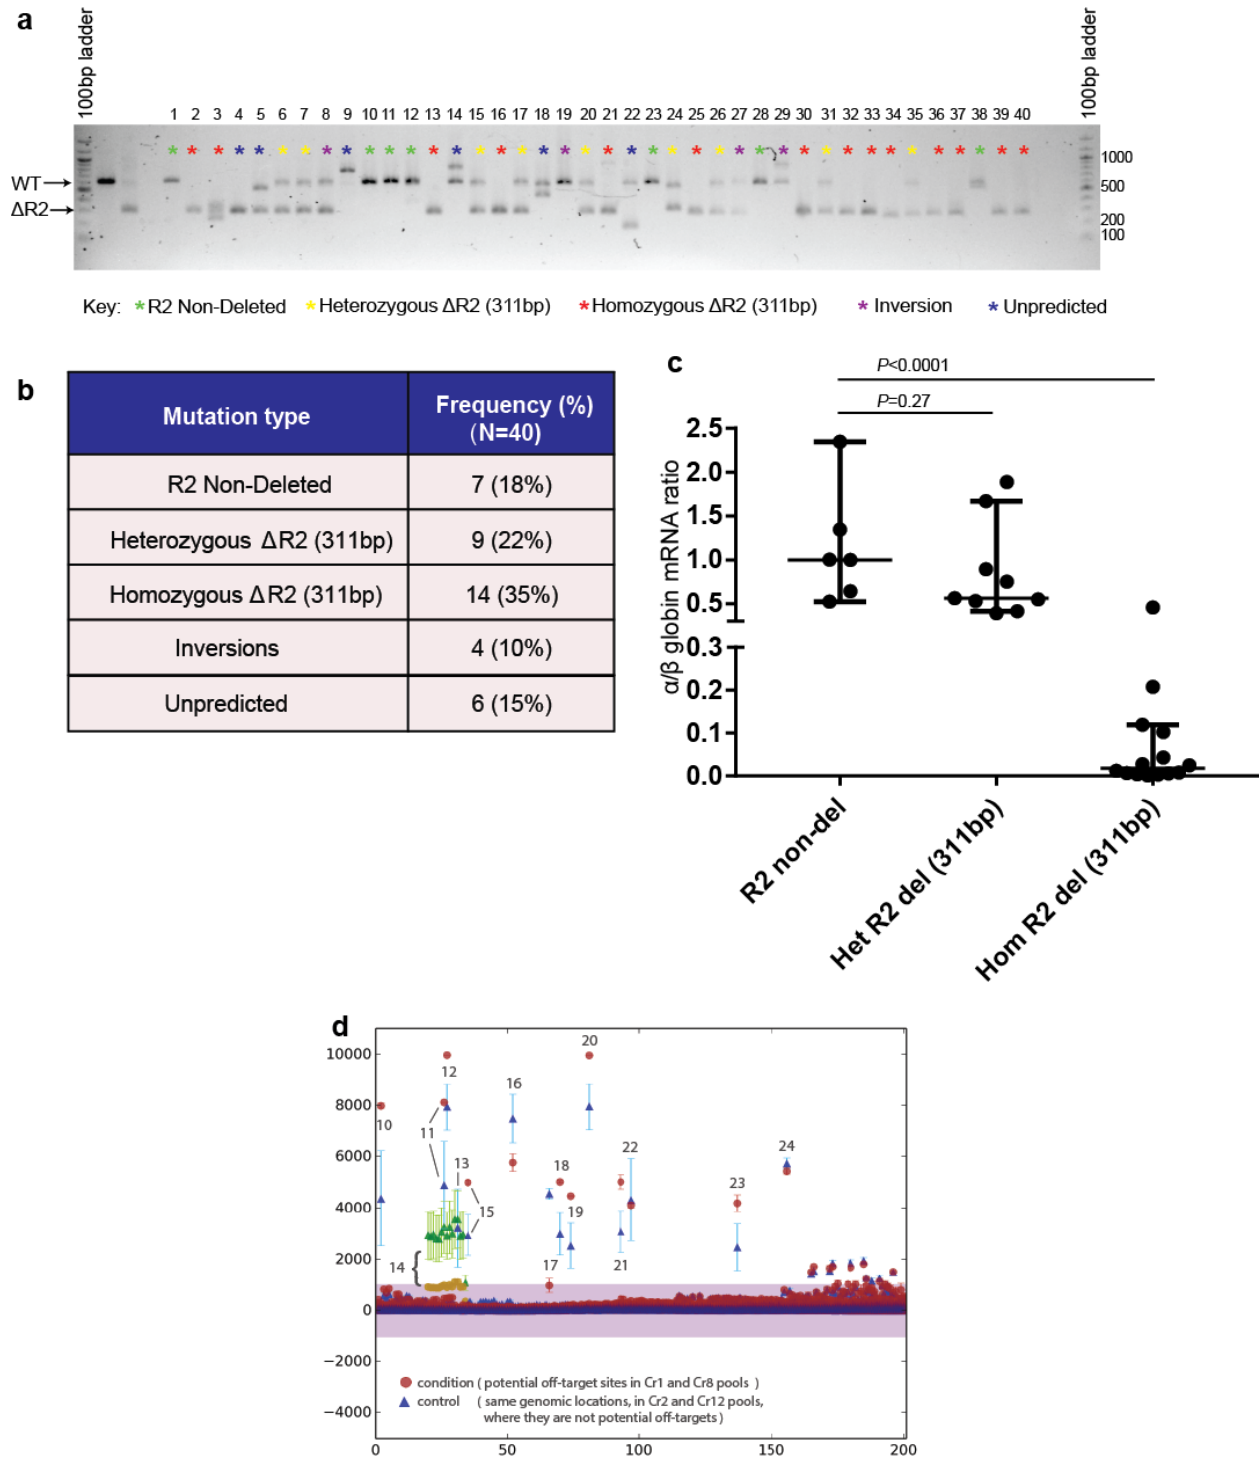

Supplementary figure 5 – Single cell clone analysis of targeted deletion of MCS-R2 using

CRISPR pair Cr1+Cr8. (a) Gel electrophoresis image of genomic DNA from 40 individual single

cell clones (from 3 independent donors) analyzed by PCR. The amplicon from the wild type allele is 613bp and the mutated amplicon is 302bp. Clones are numbered 1 – 40. Extended genotype analysis of these clones by sequencing is presented in supplementary figure 6. (b) Frequency of different types of mutations generated. (c)  $\alpha/\beta$ -globin mRNA ratios of individual clones of erythroid cells which are non-deleted (R2 non-del) (n = 7) and heterozygous (Het R2 del.) (n = 9) or homozygous (Hom R2 del.) (n = 14) for a 311bp deletion of MCS-R2 region analyzed by qPCR; median (horizontal bar) and 95% confidence interval (error bar) are shown and *P* values were calculated using Mann-Whitney test. (d) Meta-plot of all off-target loci for CRISPR pair Cr1 and Cr8. All captured sites are plotted on the same x-axis, showing +/- 100 bases from each potential off-target site. Counts deviating from the reference sequence which are normalized to 10,000 counts are plotted in the y-axis. The values are means of the libraries where each library is a pool of five independent clones. The shaded violet area denotes +/- 1000 counts and only data over this threshold was considered as off-target. Error bars represent standard error of the mean (SEM) for each base at each locus. Potential off-target hits for Cr1 and Cr8 (condition) are plotted alongside those of a control group (control). The numbers are annotated in supplementary table 4. All of the variations from the reference sequence were shown to be known SNPs or indels or novel variations common to both control and condition and therefore unrelated to potential off-target activity.



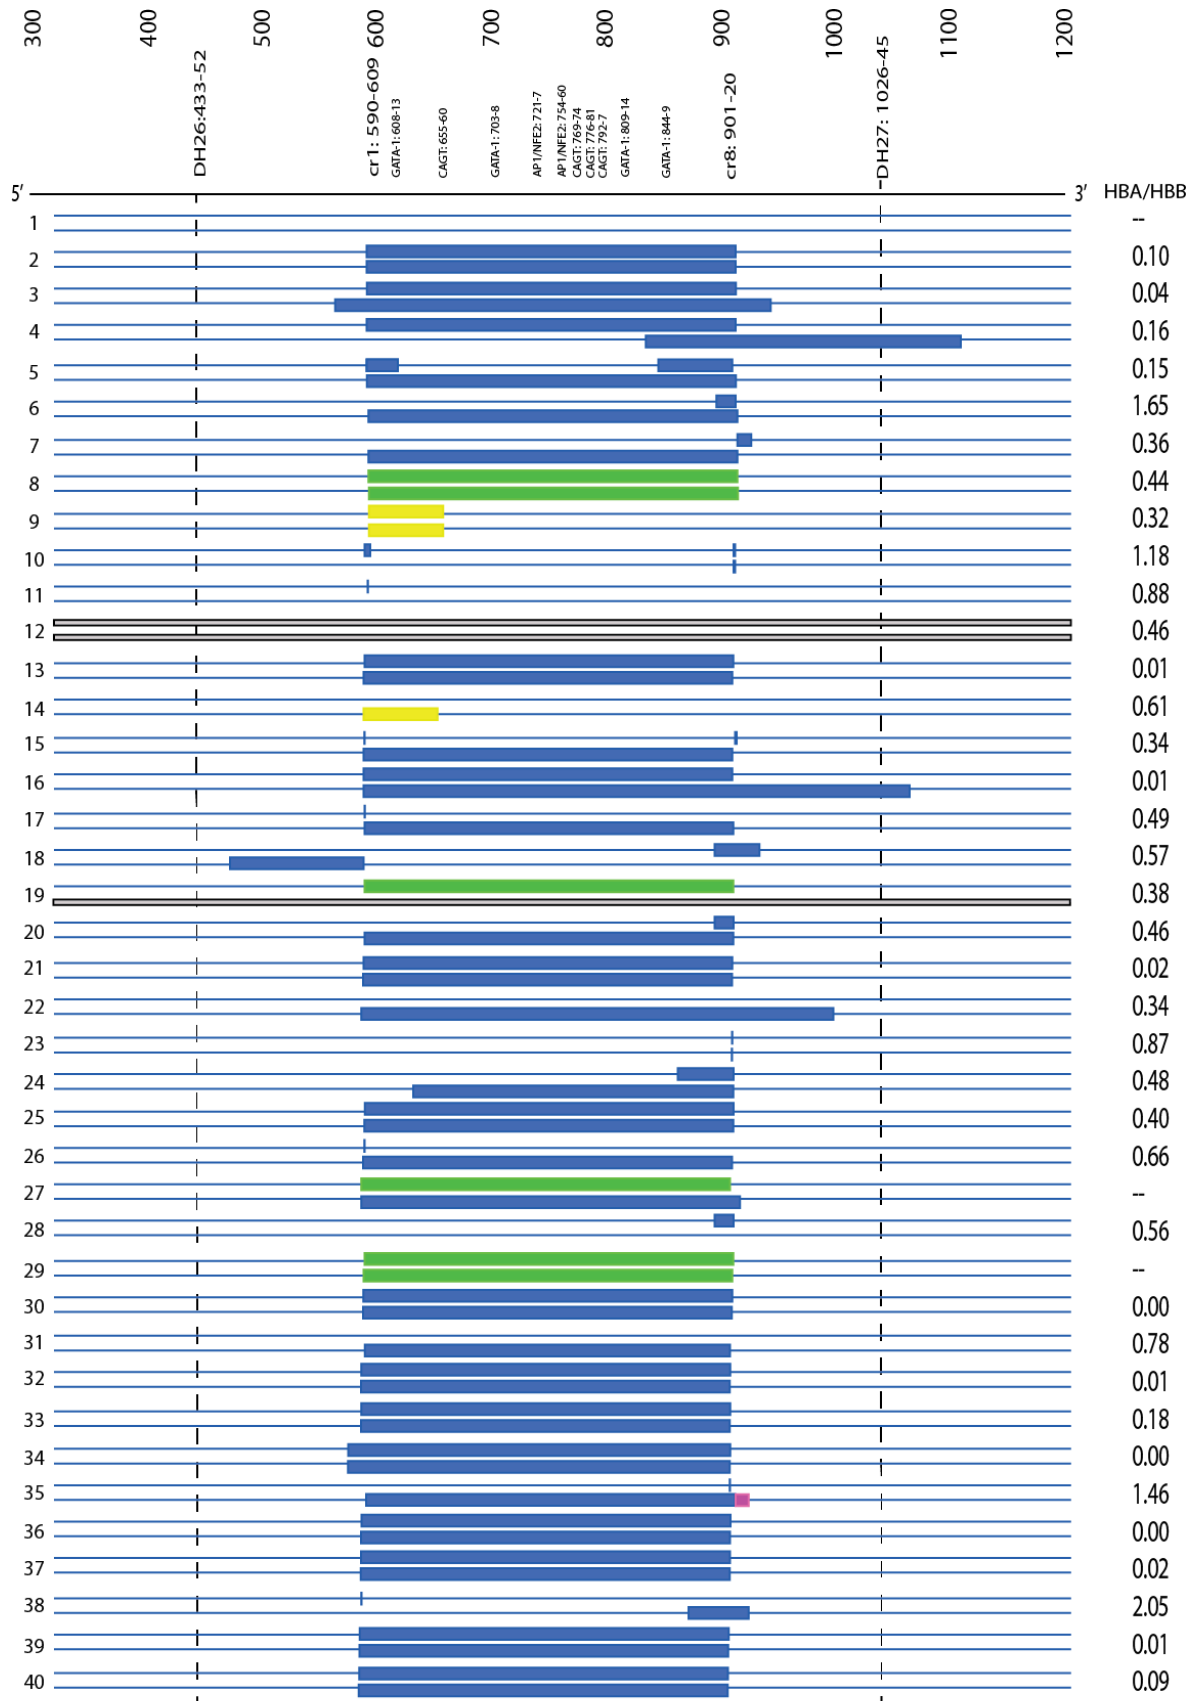

**Supplementary figure 6 – Genotype analysis by sequencing of individual single cell clones edited using CRISPR pair Cr1+Cr8 (Clone 1-40).** Two blue lines represent each allele and different mutations are represented as follows: blue bars – deletions, green bars – inversions, yellow bar – vector insertion, pink bar – insertion. Single base pair variations that were observed around gRNA binding sites are not shown. The grey bars extending across represent lack of sequence data (either not attempted or unreadable). Vertical dashed lines show the sites of forward (DH26) and reverse (DH27) primers used for PCR amplification shown in supplementary figure 5a. Expected break points of CRISPR 1 (Cr1) and CRISPR 8 (Cr8) as well as the important transcription factor binding motifs of the MCS-R2 enhancer are annotated at the top of the diagram. The  $\alpha/\beta$ -globin mRNA ratios (HBA/HBB) of individual clones are presented next to the genotype diagram. The co-ordinates from this contig are from Hum Mar 2006 (NCBI36/hg18) Assembly where 1 on this contig is equivalent to chr16: 102901. Deletions that extended beyond the oligonucleotides DH26 and/or DH27 were analysed with oligos further out.

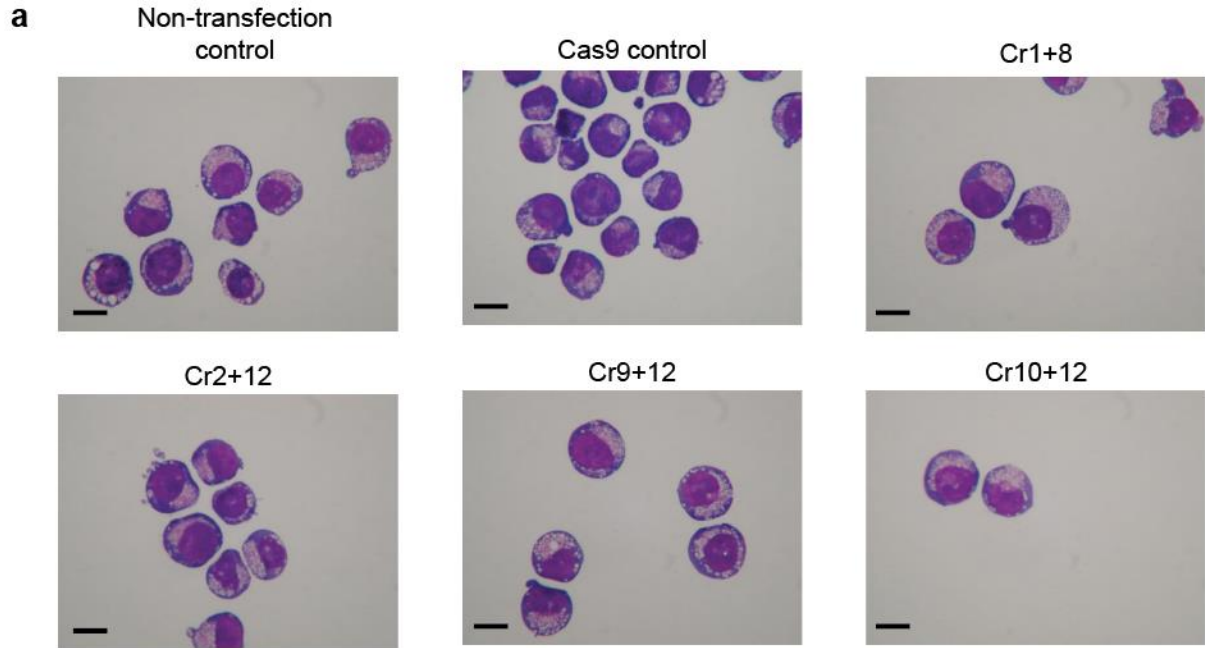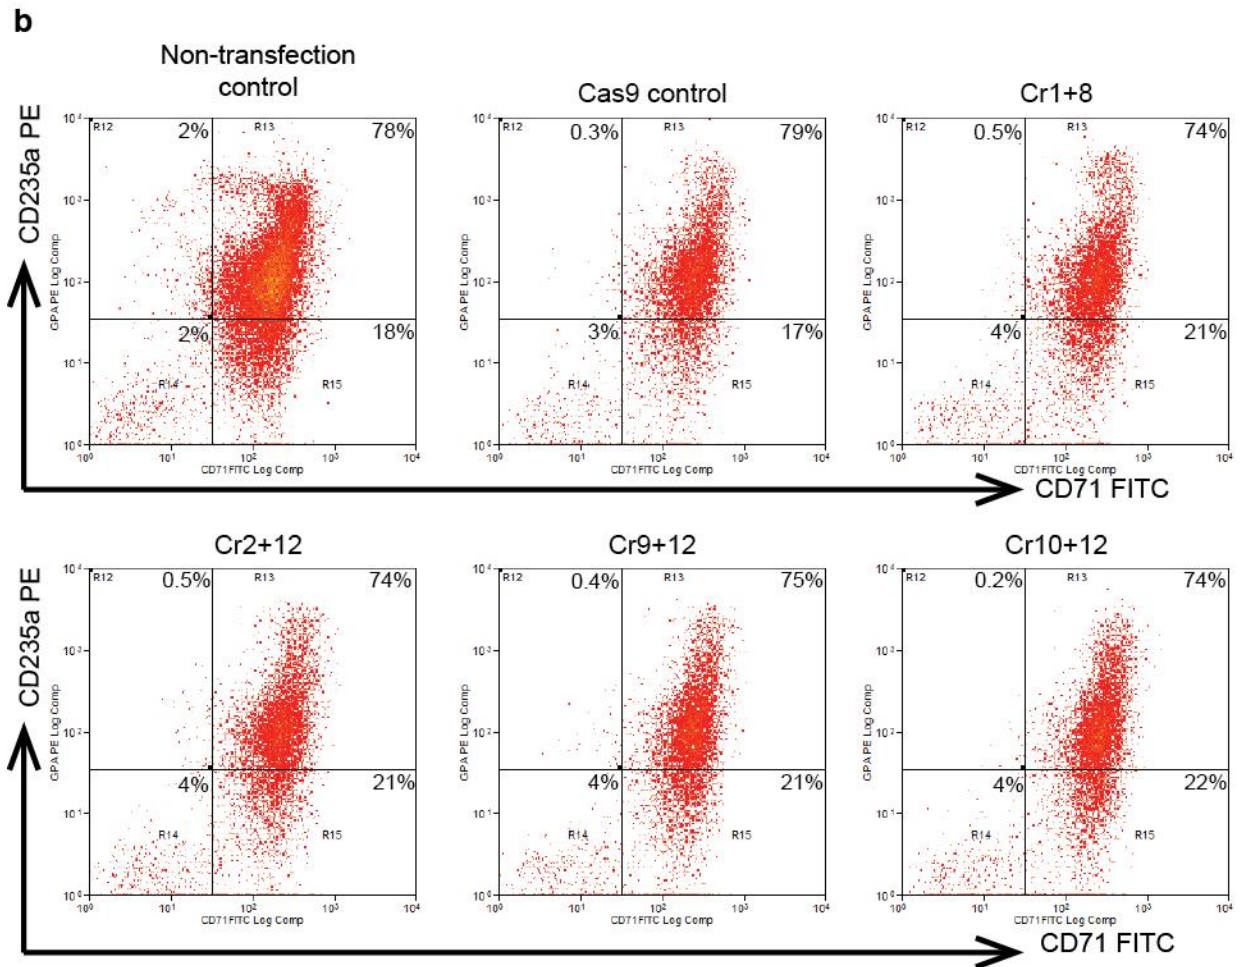

**Supplementary figure 7 – Erythroid differentiation of CRISPR edited cells.** (a) Representative cytopins of cells stained by modified Wright stain demonstrating cells of similar differentiation stages in genome edited and control samples; scale bar represents 10  $\mu\text{m}$  (n=3) (b) Flow cytometry plots of cells stained with FITC-conjugated anti-CD71 and PE-conjugated anti-CD235a antibodies demonstrating the expected erythroid differentiation profile for genome-edited and control cells (n=3). Gating strategy is shown in supplementary figure 10.

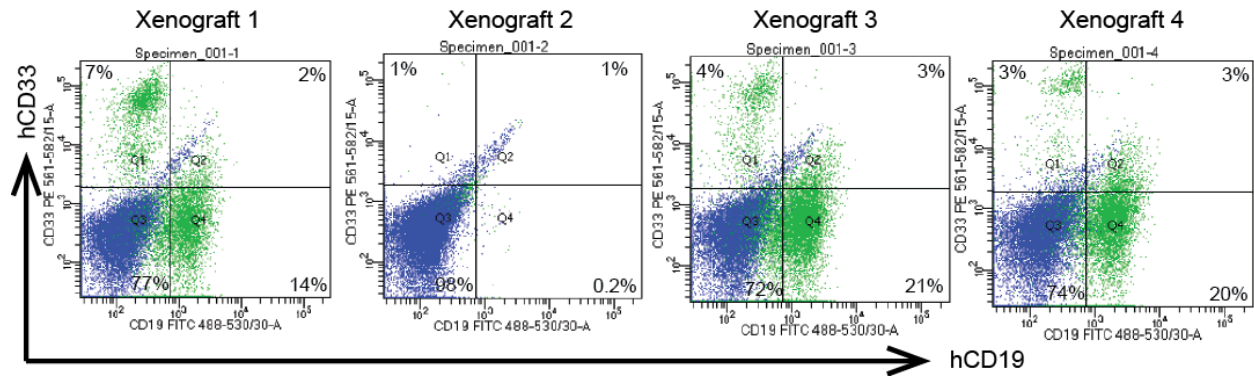

**Supplementary figure 8 – Multipotentiality of genome edited human HSCs from xenograft mice.** Flow cytometry plots of harvested bone marrow from xenograft mice gated for live human CD45+ cells demonstrating expression of human CD19 (lymphoid) and human CD33 (myeloid) cell surface markers. Gating strategy is shown in supplementary figure 10.

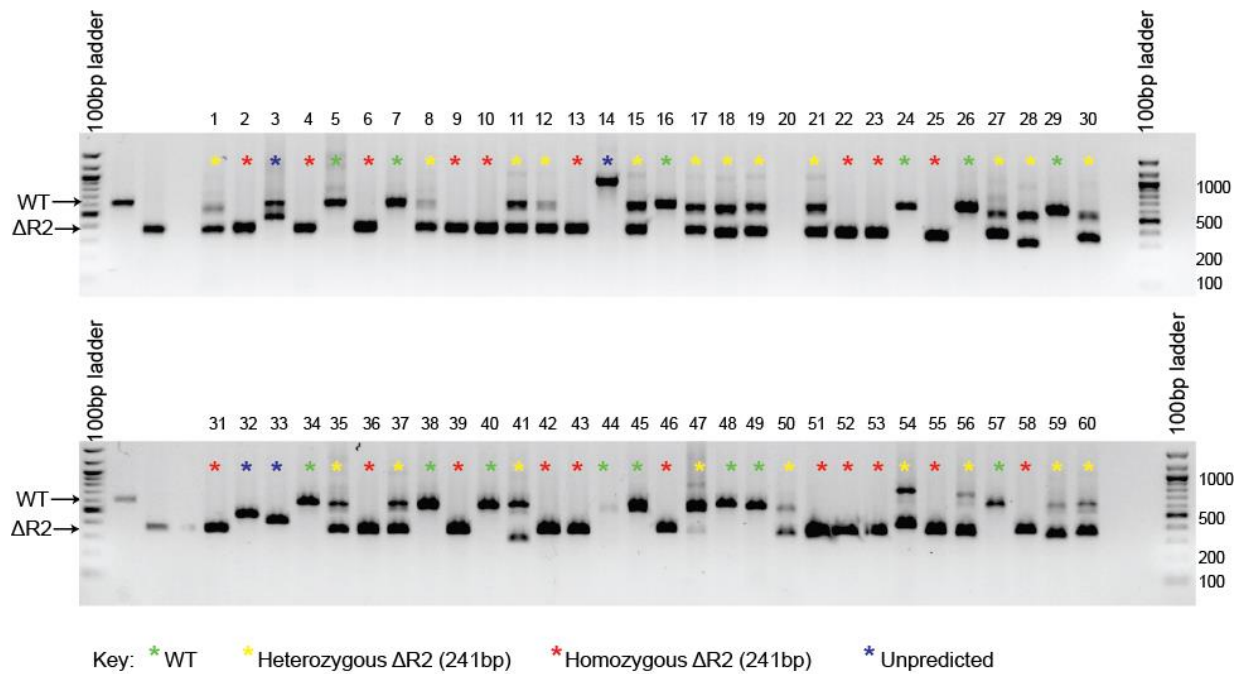

**Supplementary figure 9 – Single cell clone analysis of targeted deletion of MCS-R2 in HbE  $\beta$ -thalassemia cells using CRISPR pair Cr2+Cr12.** Gel electrophoresis image of genomic DNA from 60 individual single cell clones (from 3 independent donors) analyzed by PCR. The amplicon from the wild type allele is 613bp and the mutated amplicon is 372bp. Clones are numbered 1 – 60.

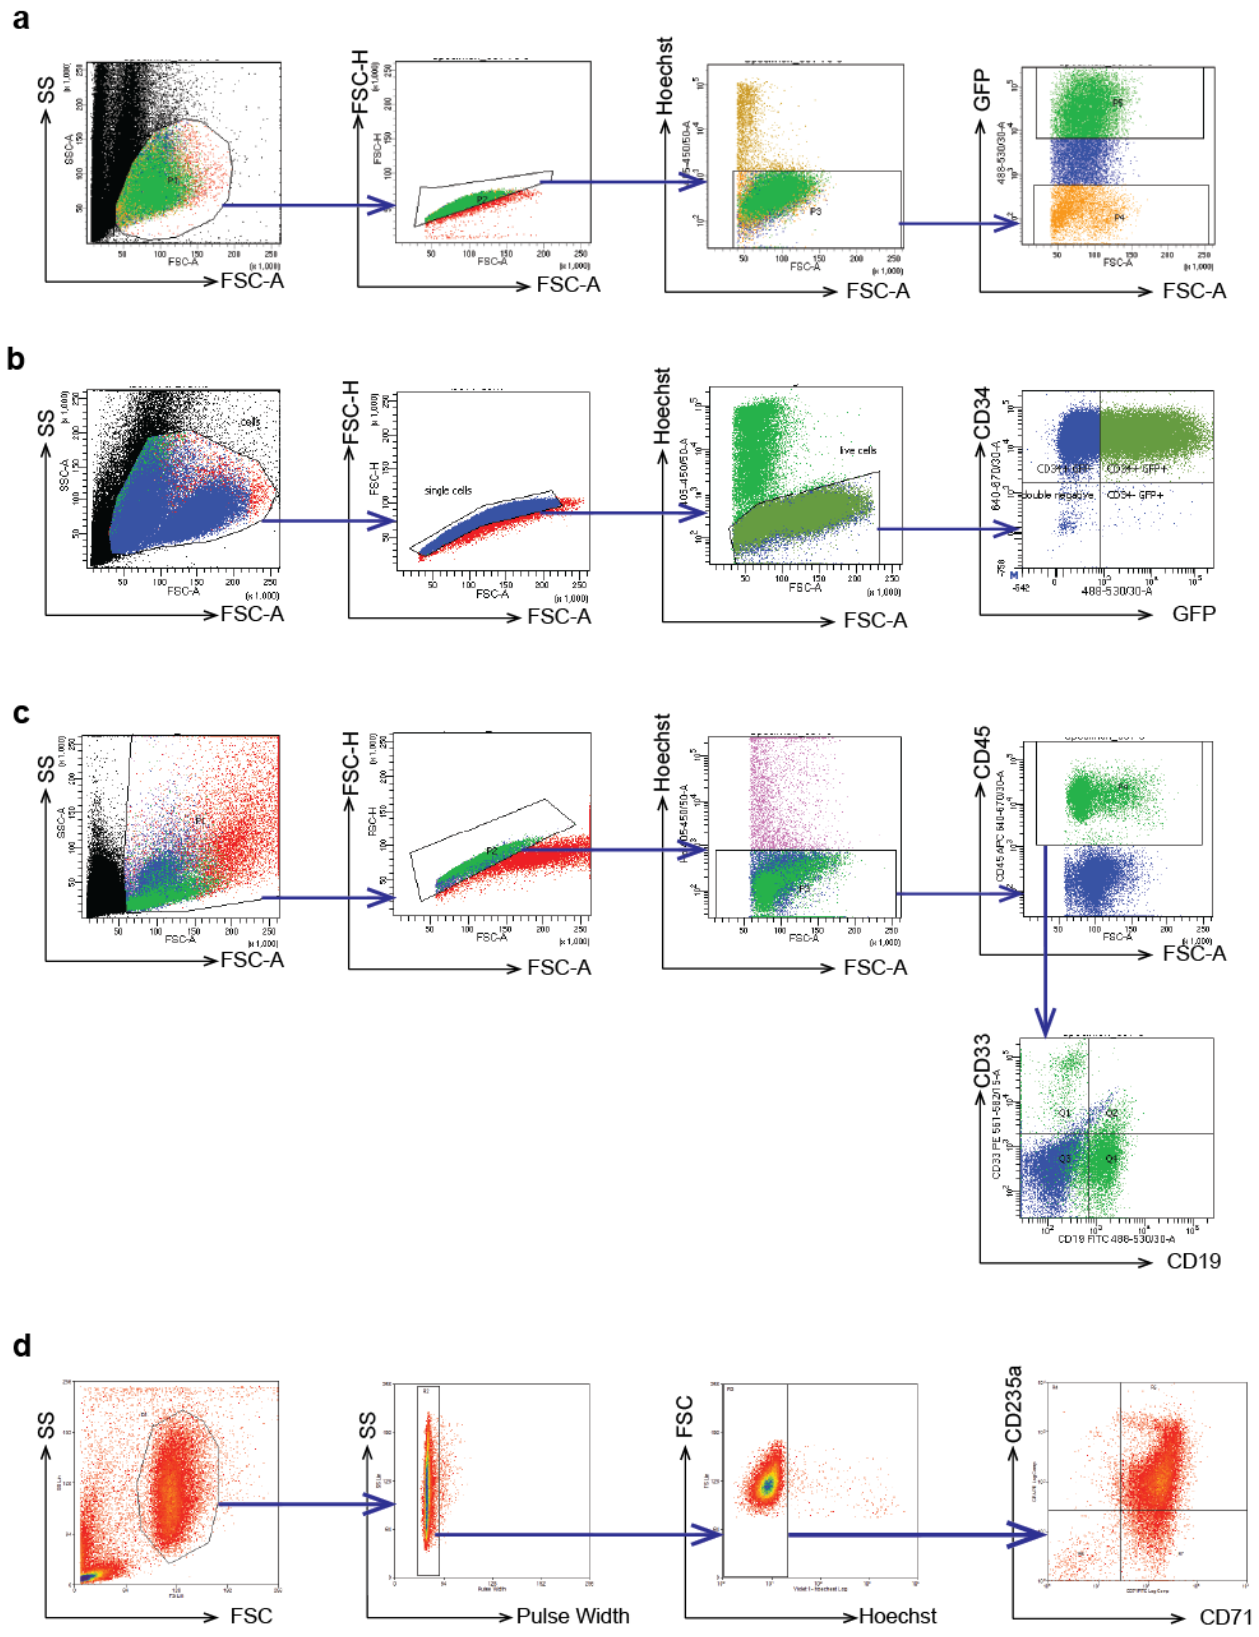

**Supplementary figure 10 – Flow cytometry gating strategy.** (a) Gating strategy for figure 2b. (b) Gating strategy for figure 4b. (c) Gating strategy for figure 4c and supplementary figure 8. (d) Gating strategy for supplementary figure 7b. Abbreviations: FSC, Forward Scatter; SS, Side Scatter; GFP, Green Fluorescent Protein.



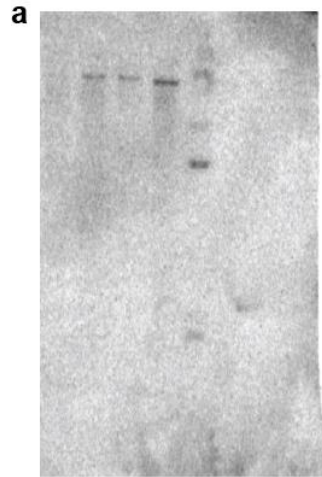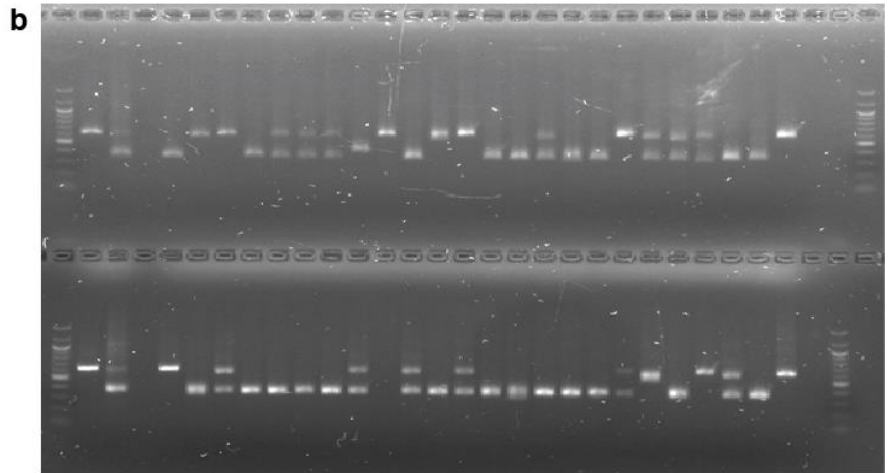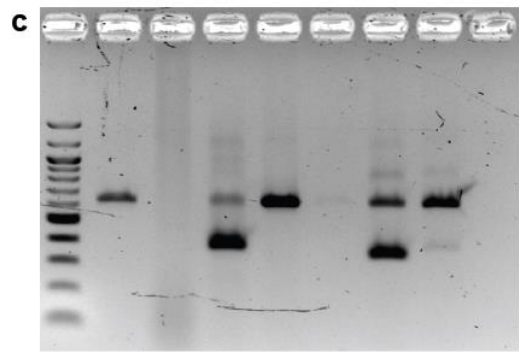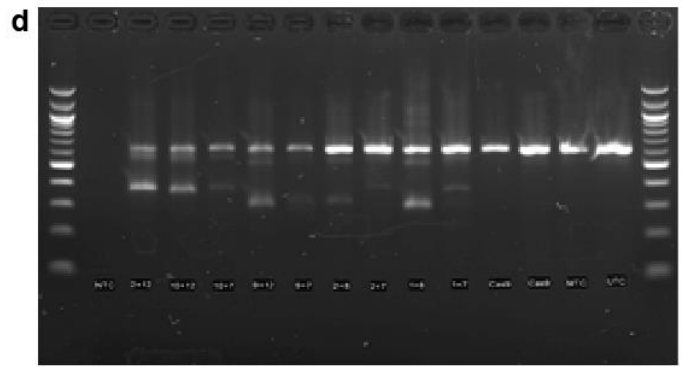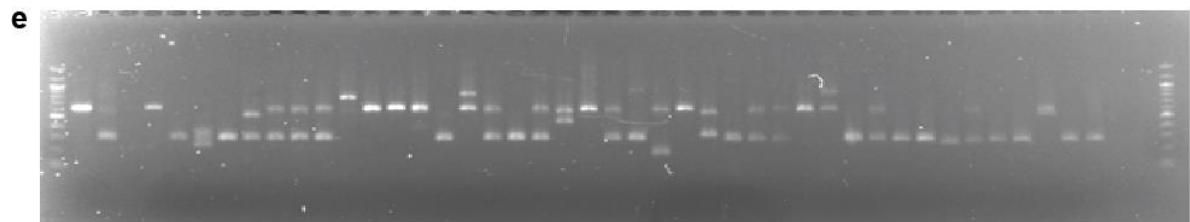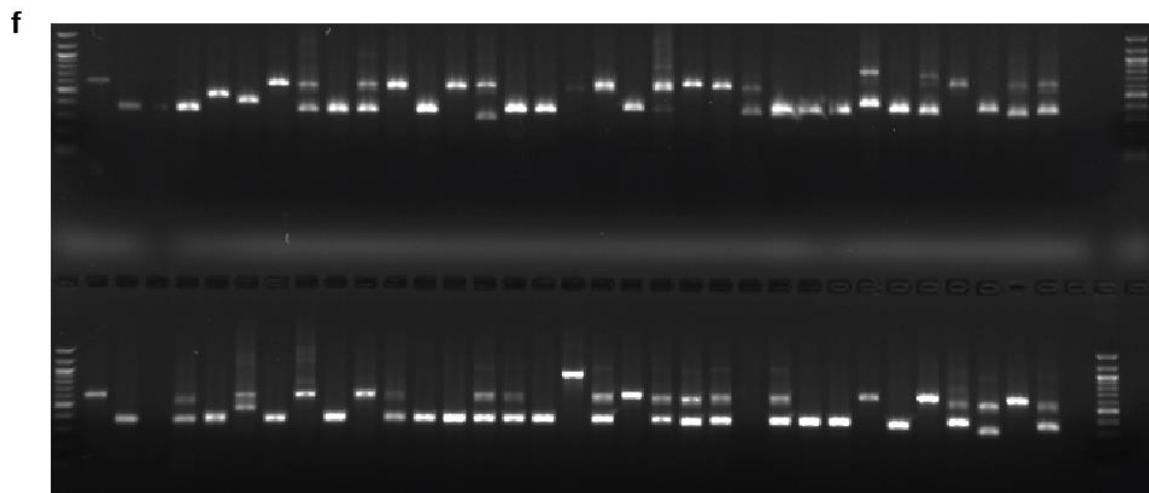

**Supplementary figure 11 - Uncropped scans of all gels.** (a) Uncropped image of figure 1e. (b) Uncropped image of figure 3a. (c) Uncropped image of figure 4d. (d) Uncropped image of supplementary figure 3. (e) Uncropped image of supplementary figure 5. (f) Uncropped image of supplementary figure 9.

**Supplementary table 1 – Clinical and molecular characteristics of individuals with natural mutation [( $\alpha\alpha$ )<sup>ALT</sup>] confined to MCS-R2**

|                                                                | MC                           | RC                           |
|----------------------------------------------------------------|------------------------------|------------------------------|
| Age                                                            | 59 years                     | 18 years                     |
| Hemoglobin HPLC                                                |                              |                              |
| HbA <sub>2</sub>                                               | 1.4%                         | 2.7%                         |
| HbF                                                            | 0.3%                         | 0.5%                         |
| HbH                                                            | ~3%                          | Not detected                 |
| Serum Iron ( $\mu\text{g/dL}$ )                                | 108 (Normal 59-158)          | 80 (Normal 37-145)           |
| Serum Transferrin (mg/dL)                                      | 210 (Normal 200-360)         | 295 (Normal 200-360)         |
| Serum Ferritin (ng/ml)                                         | 1139 (Normal 28-397)         | 28 (Normal 6-159)            |
| $\beta$ -globin genotype (sequencing)                          | Normal $\beta$ -globin genes | Normal $\beta$ -globin genes |
| $\alpha$ -globin expression level relative to a normal control | 0.3                          | 0.55                         |

**Supplementary table 2 - sgRNA sequences of CRISPR target sites within and around MCS-R2 enhancer region**

| CRISPR ID | Target sequence     |
|-----------|---------------------|
| Cr1       | TCGACCCTCTGGAACCTAT |
| Cr2       | CGACCCTCTGGAACCTATC |
| Cr7       | CTCCTGTTTATCTGAGAGG |
| Cr8       | GACCCAGACAGTAAATACG |
| Cr9       | CTTCTGCAACCATGATGAC |
| Cr10      | AGAGGGGCCCTCGACCCTC |
| Cr12      | CCCTCCTGTTTATCTGAGA |



**Supplementary table 4 – Results of off-target screening**

| CRISPR Number | Off-target location       | Mis-matches | Strand | Feature  | Gene    | SNP/indel locations | Alleles (ref/alt) | MAF | Number in figure | Name in literature |
|---------------|---------------------------|-------------|--------|----------|---------|---------------------|-------------------|-----|------------------|--------------------|
| 1             | chr1:2520380-2520402      | 4           | -      | exonic   | PANK4   |                     |                   |     |                  |                    |
| 1             | chr2:69752276-69752298    | 4           | +      | intronic | ANXA4   | chr2:69752263       | A/T               | 0.2 | 17               | rs6736776          |
| 1             | chr3:128396586-128396608  | 4           | +      | intronic | EEFSEC  | chr3:128396538      | A/G <sup>1</sup>  | 0.2 | 13               | rs1735527          |
| 1             | chr3:18144885-18144907    | 4           | -      | intronic | TBC1D5  |                     |                   |     |                  |                    |
| 1             | chr5:19987948-19987970    | 4           | -      | intronic | CDH18   |                     |                   |     |                  |                    |
| 1             | chr7:31915080-31915102    | 3           | -      | intronic | PDE1C   | chr7:31915036       | G/T               | 0.3 | 15               | rs1016191          |
|               |                           |             |        |          |         | chr7:31915071       | T/A               | 0.3 | 18               | rs2109836          |
| 1             | chr7:133962519-133962541  | 4           | -      | intronic | EXOC4   |                     |                   |     |                  |                    |
| 1             | chr8:10973474-10973496    | 4           | -      | intronic | XKR6    |                     |                   |     |                  |                    |
| 1             | chr10:12715111-12715133   | 4           | -      | intronic | CAMK1D  |                     |                   |     |                  |                    |
| 1             | chr10:71737918-71737940   | 4           | -      | intronic | CDH23   |                     |                   |     |                  |                    |
| 1             | chr10:79168076-79168098   | 4           | -      | intronic | ZMIZ1   |                     |                   |     |                  |                    |
| 1             | chr11:7504765-7504787     | 3           | -      | intronic | OLFML1  |                     |                   |     |                  |                    |
| 1             | chr12:2496273-2496295     | 4           | +      | intronic | CACNA1C | chr12:2496220       | G/A               | 0.4 | 11               | rs1015287          |
| 1             | chr12:116475-116497       | 4           | -      | intronic | IQSEC3  | chr12:116448        | T/C               | 0.4 | 16               | rs10744726         |
|               |                           |             |        |          |         | chr12:116489        | G/A               | 0.2 | 21               | rs11064561         |
|               |                           |             |        |          |         | chr12:116533        | G/A               | 0.2 | 23               | rs9668025          |
| 1             | chr12:131742291-131742313 | 4           | -      | intronic | SFSWAP  |                     |                   |     |                  |                    |
| 1             | chr14:64394274-64394296   | 4           | +      | intronic | MTHFD1  | chr14:64394292      | G/C <sup>2</sup>  | 0.2 | 22               | rs55739639         |
| 1             | chr15:65328877-65328899   | 4           | -      | exonic   | IGDCC3  | chr15:65328800      | G/A               | 0.4 | 10               | rs11853777         |
| 1             | chr17:9573003-9573025     | 4           | +      | intronic | STX8    | chr17:9573081       | C/del1            | 0.1 | 24               | rs71135994         |
| 1             | chr17:78027622-78027644   | 4           | +      | intronic | TNRC6C  |                     |                   |     |                  |                    |
| 1             | chr19:46009930-46009952   | 4           | -      | intronic | CCDC61  | chr19:46009872-86   | NA <sup>3</sup>   | -   | 14               |                    |
| 1             | chr19:46009930-46009952   | 4           | -      | intronic | CCDC61  | chr19:46009925      | NA <sup>4</sup>   | -   | 19               |                    |
| 1             | chr20:43524569-43524591   | 4           | +      | intronic | L3MBTL1 |                     |                   |     |                  |                    |
| 1             | chr22:28005714-28005736   | 4           | -      | intronic | TTC28   |                     |                   |     |                  |                    |

|    |                           |   |   |          |          |                                    |                  |            |          |                          |
|----|---------------------------|---|---|----------|----------|------------------------------------|------------------|------------|----------|--------------------------|
| 8  | chr2:10311037-10311059    | 4 | + | Intronic | HPCAL1   | chr2:10311039<br>chr2:10310985     | A/G<br>A/G       | 0.3<br>0.3 | 20<br>12 | rs16856098<br>rs11695971 |
| 8  | chr4:808708-808730        | 4 | - | Intronic | CPLX1    |                                    | -                |            |          |                          |
| 8  | chr12:2696698-2696720     | 4 | + | Intronic | CACNA1C  |                                    | -                |            |          |                          |
| 8  | chr15:42726967-42726989   | 4 | - | Intronic | CDAN1    |                                    | -                |            |          |                          |
| 8  | chr16:88775046-88775068   | 4 | - | Intronic | PIEZO1   |                                    | -                |            |          |                          |
| 8  | chr17:66977851-66977873   | 4 | + | Intronic | CACNG4   |                                    | -                |            |          |                          |
| 2  | chr1:18294783-18294805    | 4 | + | Intronic | IGSF21   |                                    |                  |            |          |                          |
| 2  | chr4:86840217-86840239    | 4 | + | Intronic | SLC10A6  |                                    |                  |            |          |                          |
| 2  | chr5:139259569-139259591  | 4 | + | Intronic | SIL1     |                                    |                  |            |          |                          |
| 2  | chr12:132908486-132908508 | 4 | - | Intronic | CHFR     | chr12:132908470<br>chr12:132908532 | C/T<br>A/G       | 0.7<br>0.2 | 1<br>5   | rs4758916<br>rs4758917   |
| 2  | chr14:104936545-104936567 | 4 | + | Exonic   | PLD4     | chr14:104936657                    | T/C              | 0.4        | 8        | rs10083374               |
| 2  | chr20:43952512-43952534   | 4 | + | Intronic | TOX2     |                                    | -                |            |          |                          |
| 2  | chr22:41697129-41697151   | 4 | - | Exonic   | C22orf46 |                                    | -                |            |          |                          |
| 2  | chrX:123429476-123429498  | 4 | + | Intronic | GRIA3    |                                    | -                |            |          |                          |
| 12 | chr3:60409075-60409097    | 4 | - | Intronic | FHIT     |                                    | -                |            |          |                          |
| 12 | chr3:63291375-63291397    | 4 | + | Intronic | SYNPR    | chr3:63291390-93                   | AGAG/del4        | 0.4        | 3        | rs34549935               |
| 12 | chr7:44963946-44963968    | 4 | - | Intronic | MYO1G    |                                    | -                |            |          |                          |
| 12 | chr7:108238683-108238705  | 4 | + | Intronic | NRCAM    |                                    | -                |            |          |                          |
| 12 | chr8:20151479-20151501    | 4 | + | Intronic | SLC18A1  |                                    | -                |            |          |                          |
| 12 | chr9:124886773-124886795  | 4 | - | Intronic | GOLGA1   |                                    | -                |            |          |                          |
| 12 | chr9:4854138-4854160      | 4 | - | Intronic | RCL1     | chr9:4854253                       | C/T              | 0.05       | 9        | rs10974815               |
| 12 | chr10:121915516-121915538 | 4 | + | Intronic | ATE1     | chr10:121915615                    | C/T              | 0.5        | 7        | rs7893846                |
| 12 | chr11:1398795-1398817     | 4 | + | Intronic | BRSK2    | chr11:131549255                    | C/T <sup>5</sup> | 0.003      | 2        | rs577118723              |
| 12 | chr11:115380458-115380480 | 4 | + | Intronic | CADM1    | chr11:115380472                    | C/T              | 0.01       | 4        | rs11608105               |
| 12 | chr11:131549252-131549274 | 4 | + | Intronic | NTM      |                                    | -                |            |          |                          |
| 12 | chr14:78597901-78597923   | 4 | - | Intronic | NRXN3    |                                    | -                |            |          |                          |
| 12 | chr18:48673045-48673067   | 4 | - | Intronic | CTIF     |                                    | -                |            |          |                          |
| 12 | chr18:31916503-31916525   | 4 | - | Intronic | TRAPPC8  | chr18:31916593                     | C/T              | 0.01       | 6        | rs62093870               |
| 12 | chr19:38271812-38271834   | 4 | - | Intronic | SPINT2   |                                    | -                |            |          |                          |

|    |                         |   |   |          |        |  |   |  |  |  |
|----|-------------------------|---|---|----------|--------|--|---|--|--|--|
| 12 | chr20:9120242-9120264   | 4 | - | Intronic | PLCB4  |  | - |  |  |  |
| 12 | chr22:35822072-35822094 | 4 | + | Intronic | RBFOX2 |  | - |  |  |  |

- 1 Previously described SNP - G seen only in control sample
- 2 Variable site with novel SNP = G/C in hg38/hg38alt, G/T observed in both condition and control
- 3 Novel 15bp deletion - observed in both condition and control, not described in 1000 genomes database (phase1 Aug 2015)
- 4 Novel 1bp deletion - observed in both in condition and control, not described in 1000 genomes database (phase1 Aug 2015)
- 5 Previously described rare SNP - T seen only in condition sample

**Supplementary table 5 – Clinical and molecular characteristics of the donors with HbE/ $\beta$ -thalassaemia**

|                                                  | <b>Donor 1</b>                        | <b>Donor 2</b>                        | <b>Donor 3</b>                        |
|--------------------------------------------------|---------------------------------------|---------------------------------------|---------------------------------------|
| Age                                              | 33 years                              | 30 years                              | 13 years                              |
| Sex                                              | Female                                | Female                                | Male                                  |
| Clinical Phenotype                               | Moderate-severe HbE/beta-thalassaemia | Moderate-severe HbE/beta-thalassaemia | Moderate-severe HbE/beta-thalassaemia |
| Beta-thalassaemia mutation                       | IVSI-5 G>C                            | IVSI-5 G>C                            | IVSI-5 G>C                            |
| Alpha globin status                              | $\alpha\alpha/\alpha\alpha$           | $\alpha\alpha/\alpha\alpha$           | $\alpha\alpha/\alpha\alpha$           |
| Age at first blood transfusion                   | 3 years                               | 8 months                              | 6 years                               |
| Hemoglobin before first blood transfusion (g/dl) | Not known                             | 8.7                                   | 4.8                                   |
| Pre transfusion HPLC                             |                                       |                                       |                                       |
| HbA (%)                                          | 19.2                                  | 16.9                                  | 4.9                                   |
| HbF (%)                                          | 38.3                                  | 39.8                                  | 30.6                                  |
| HbE (%)                                          | 39.5                                  | 42.8                                  | 60.5                                  |
| Spleen                                           | Splenectomy at 9 years                | Splenectomy at 13 years               | Spleen - 10cm                         |
| Transfusion requirement                          | 3-4 monthly                           | 3-4 monthly                           | 2-3 monthly                           |
| Serum Ferritin (ng/ml)                           | 846                                   | 374                                   | 672                                   |
